# Supplementary material
Source: Elsevier journal article supplement (https://authors.library.caltech.edu/56503/6/mmc5.zip)
Supplement: mmc5 [file mmc5.zip]

Archive with 1 entries (1 files):
- T177_Mints_Error.grd
